# Supplementary material
Source: publisher figshare collection journal article supplement (https://rs.figshare.com/ndownloader/files/16416419)
Supplement: Supplementary file 1 [file 16416419]

NOTE: First open the file labelled "Paukner2017_SPSS_start_file", which contains the original Paukner et al. (2017) cross-target lipsmacking and tongue protrusion data transposed to SPSS format. 
Then run the entire syntax below, which will recreate the file labelled "Paukner2017_SPSS_end_file" and reproduce the reported analyses.

DATASET ACTIVATE DataSet1.

COMPUTE d1_tp_matching_increase=d1_tp_to_tp_s-d1_tp_to_tp_b.
COMPUTE d3_tp_matching_increase=d3_tp_to_tp_s-d3_tp_to_tp_b.
COMPUTE d5_tp_matching_increase=d5_tp_to_tp_s-d5_tp_to_tp_b.
COMPUTE d7_tp_matching_increase=d7_tp_to_tp_s-d7_tp_to_tp_b.
EXECUTE.

COMPUTE d1_tp_control_increase=d1_tp_to_lps_s-d1_tp_to_lps_b.
COMPUTE d3_tp_control_increase=d3_tp_to_lps_s-d3_tp_to_lps_b.
COMPUTE d5_tp_control_increase=d5_tp_to_lps_s-d5_tp_to_lps_b.
COMPUTE d7_tp_control_increase=d7_tp_to_lps_s-d7_tp_to_lps_b.
EXECUTE.

COMPUTE d1_tp_imitator_index=d1_tp_matching_increase-d1_tp_control_increase.
COMPUTE d3_tp_imitator_index=d3_tp_matching_increase-d3_tp_control_increase.
COMPUTE d5_tp_imitator_index=d5_tp_matching_increase-d5_tp_control_increase.
COMPUTE d7_tp_imitator_index=d7_tp_matching_increase-d7_tp_control_increase.
EXECUTE.

COMPUTE mean_tp_imitation_index=MEAN(d1_tp_imitator_index,d3_tp_imitator_index,
    d5_tp_imitator_index,d7_tp_imitator_index).
EXECUTE.

COMPUTE d1_lps_matching_increase=d1_lps_to_lps_s-d1_lps_to_lps_b.
COMPUTE d3_lps_matching_increase=d3_lps_to_lps_s-d3_lps_to_lps_b.
COMPUTE d5_lps_matching_increase=d5_lps_to_lps_s-d5_lps_to_lps_b.
COMPUTE d7_lps_matching_increase=d7_lps_to_lps_s-d7_lps_to_lps_b.
EXECUTE.

COMPUTE d1_lps_control_increase=d1_lps_to_tp_s-d1_lps_to_tp_b.
COMPUTE d3_lps_control_increase=d3_lps_to_tp_s-d3_lps_to_tp_b.
COMPUTE d5_lps_control_increase=d5_lps_to_tp_s-d5_lps_to_tp_b.
COMPUTE d7_lps_control_increase=d7_lps_to_tp_s-d7_lps_to_tp_b.
EXECUTE.

COMPUTE d1_lps_imitator_index=d1_lps_matching_increase-d1_lps_control_increase.
COMPUTE d3_lps_imitator_index=d3_lps_matching_increase-d3_lps_control_increase.
COMPUTE d5_lps_imitator_index=d5_lps_matching_increase-d5_lps_control_increase.
COMPUTE d7_lps_imitator_index=d7_lps_matching_increase-d7_lps_control_increase.
EXECUTE.

COMPUTE mean_lps_imitation_index=MEAN(d1_lps_imitator_index,d3_lps_imitator_index,
    d5_lps_imitator_index,d7_lps_imitator_index).
EXECUTE.

DATASET ACTIVATE DataSet1.
T-TEST
  /TESTVAL=0
  /MISSING=ANALYSIS
  /VARIABLES=mean_tp_imitation_index mean_lps_imitation_index
  /CRITERIA=CI(.95).

COMPUTE mean_tp_matching_increase=MEAN(d1_tp_matching_increase,d3_tp_matching_increase,
    d5_tp_matching_increase,d7_tp_matching_increase).
COMPUTE mean_tp_control_increase=MEAN(d1_tp_control_increase,d3_tp_control_increase,
    d5_tp_control_increase,d7_tp_control_increase).
COMPUTE mean_lps_matching_increase=MEAN(d1_lps_matching_increase,d3_lps_matching_increase,
    d5_lps_matching_increase,d7_lps_matching_increase).
COMPUTE mean_lps_control_increase=MEAN(d1_lps_control_increase,d3_lps_control_increase,
    d5_lps_control_increase,d7_lps_control_increase).
EXECUTE.

T-TEST PAIRS=mean_tp_matching_increase mean_lps_matching_increase WITH mean_tp_control_increase 
    mean_lps_control_increase (PAIRED)
  /CRITERIA=CI(.9500)
  /MISSING=ANALYSIS.

CORRELATIONS
  /VARIABLES=mean_lps_imitation_index mean_tp_imitation_index
  /PRINT=TWOTAIL NOSIG
  /MISSING=PAIRWISE.
